# Supplementary material
Source: PubMed Central journal article supplement (PMC4117458)
Supplement: supp_217.15.2680_JEB100685.pdf [file supp_217.15.2680_JEB100685.pdf]

## Supplemental Figures

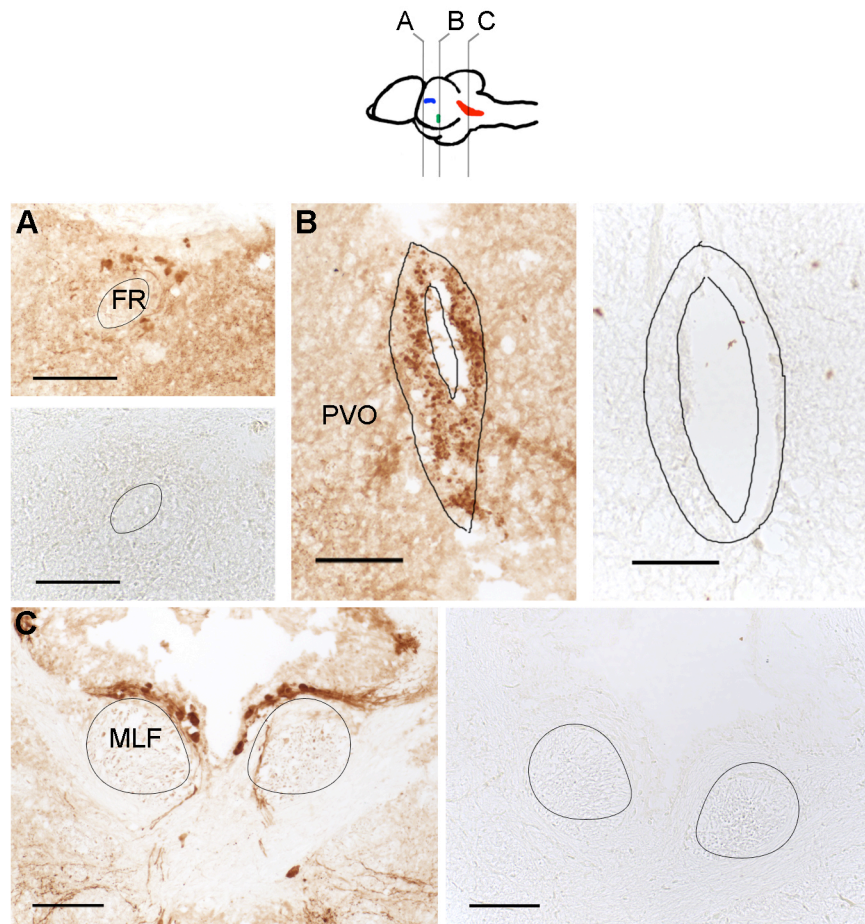

**Figure S1. PreadSORption controls for 5-HT immunohistochemistry.** No staining was present in immunohistochemistry controls where the primary antibody was preadsorbed with 5-HT BSA conjugate prior to incubation with tissue. For each panel (A-C) adjacent coronal sections from the same animal are shown with 5-HT staining (brown) and with preadsorbed antibody. Dorsal periventricular pretectal nucleus (A), nucleus of the paraventricular organ (PVO) (B) and raphe (C). FR, fasciculus retroflexus tract; MLF, medial longitudinal fasciculus tract. Scale bar = 100  $\mu\text{m}$ .

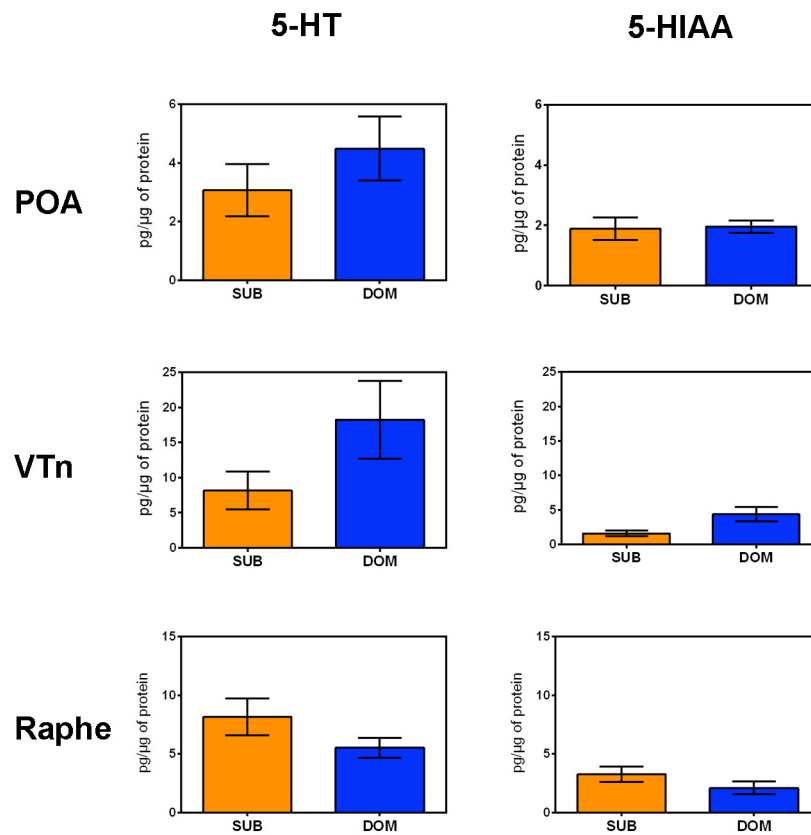

**Figure S2. Levels of serotonin (5-HT) and its catabolite, 5-hydroxyindoleacetic acid (5-HIAA), in the preoptic area (POA), ventral tuberal nucleus (VTn) and raphe by social group.** Levels of 5-HT and 5-HIAA were measured in microdissected tissue from the POA, VTn and raphe of subordinate (SUB, orange) and dominant (DOM, blue) males; there were no significant differences between groups. Data was normalized to the amount of protein measured in each sample, and is expressed as pg per  $\mu\text{g}$  of protein.

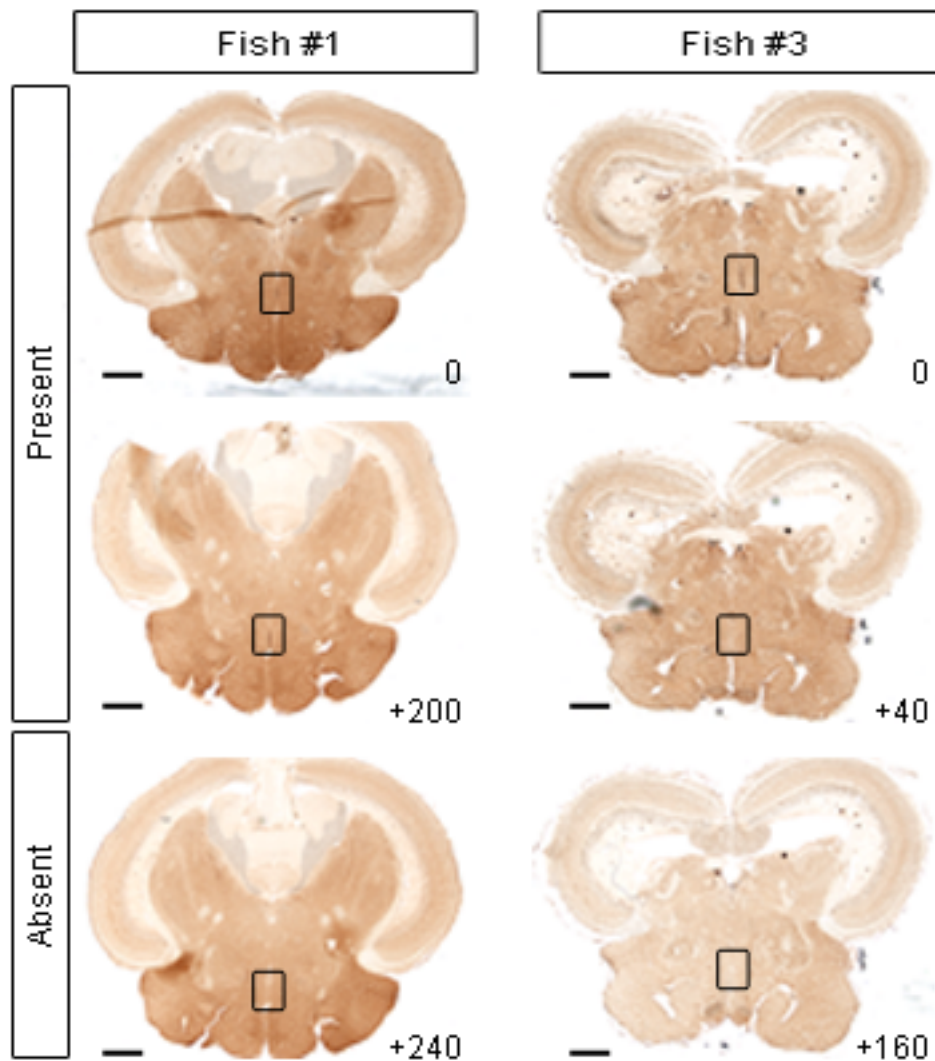

**Figure S3. Representative photomicrographs of the *Astatotilapia burtoni* male brain showing 5-HT-ir cells in the nucleus of the paraventricular organ (PVO).** Each column consists of three sequential coronal sections (anterior to posterior) for a given male fish. The top two rows depict sections with positively stained cells in the PVO (boxed area). In the bottom row, the same relative location of the PVO is boxed for a more posterior section where stained cells are absent. Distance ( $\mu\text{m}$ ) from the first section is noted in the lower right corner of each section. The purpose of these images is to serve as reference for comparison to descriptions in other species (see Table S1 for details on PVO nomenclature). Scale bars = 500  $\mu\text{m}$

**Table S1****Table of representative examples in three fish species for nomenclature variations of hypothalamic populations containing 5-HT-ir cells**

This table lists the names reported in publications that describe the location of hypothalamic populations containing 5-HT-ir cells in zebrafish (*Danio rerio*), Mexican cavefish (*Astyanax mexicanus*) and bluebanded goby (*Lythrypnus dalli*). Each row represents a given hypothalamic population or brain nucleus and each column shows information from a single publication. The purpose of this table is to illustrate the wide range of terms used to describe these populations. The column (Rink and Wulliman, 2001) is referenced as a source to show corresponding names according to earlier versions of the zebrafish brain atlas. In this study, the 5-HT-ir staining we report for the hypothalamus belongs to the PVO (nucleus of the paraventricular organ), which to the best of our knowledge, corresponds to the descriptions listed in the first row of this table.

| Species                             | <i>Danio rerio</i> , zebrafish                                              |                                                               |                                                                  | <i>Astyanax mexicanus</i> , cavefish                         | <i>Lythrypnus dalli</i> , bluebanded goby                |
|-------------------------------------|-----------------------------------------------------------------------------|---------------------------------------------------------------|------------------------------------------------------------------|--------------------------------------------------------------|----------------------------------------------------------|
| Reference                           | (Lillesaar, 2011)                                                           | (Kaslin and Panula, 2001)                                     | (Rink and Wullimann, 2001)                                       | (Elipot et al., 2012)                                        | (Lorenzi and Grober, 2012)                               |
| Abbreviation<br>Name or description | <b>PT</b><br>posterior tuberculum                                           | <b>PVOa</b><br>anterior part of the paraventricular organ     | <b>PVO</b><br>paraventricular organ                              | <b>PVa</b><br>anterior part of the paraventricular organ     | <b>NPPv</b><br>posterior <u>periventricular*</u> nucleus |
| Abbreviation<br>Name or description | <b>PT</b><br>posterior tuberculum, located posteriorly and extend laterally | <b>PVOi</b><br>intermediate part of the paraventricular organ | <b>IN</b><br>Intermediate nucleus of hypothalamus                | <b>PVi</b><br>intermediate part of the paraventricular organ | <b>NRL</b><br>nucleus of the lateral recess              |
| Abbreviation<br>Name or description | Hypothalamic                                                                | <b>PVOp</b><br>posterior part of the paraventricular organ;   | <b>HC</b><br>caudal zone of <u>periventricular*</u> hypothalamus | <b>PVp</b><br>posterior part of the paraventricular organ    | <b>NRP</b><br>nucleus of the lateral recess              |

\* The term ‘periventricular’ is underlined to emphasize its contrast to ‘paraventricular’.

**Elipot, Y., Hinaux, H., Callebert, J. and Rétaux, S.** (2012). Evolutionary shift from fighting to foraging in blind cavefish through changes in the serotonin network. *Curr. Biol.* **23**, 1-10.

**Kaslin, J. and Panula, P.** (2001). Comparative anatomy of the histaminergic and other aminergic systems in zebrafish (*Danio rerio*). *J. Comp. Neurol.* **440**, 342–377.

**Lillesaar, C.** (2011). The serotonergic system in fish. *J. Chem. Neuroanat.* **41**, 294–308.

- Lorenzi, V. and Grober, M. S.** (2012). Immunohistochemical localization of serotonin in the brain during natural sex change in the hermaphroditic goby *Lythrypnus dalli*. *Gen. Comp. Endocrinol.* **175**, 527–536.
- Rink, E. and Wullmann, M. F.** (2001). The teleostean (zebrafish) dopaminergic system ascending to the subpallium (striatum) is located in the basal diencephalon (posterior tuberculum). *Brain Res.* **889**, 316–330.

**Table S2****Correlations between 11-ketotestosterone (11-KT) and gonadosomatic indices (GSI) and the different measurements of serotonin turnover in discrete brain nuclei**

Correlations of parameters of reproductive capacity (circulating 11-KT and GSI) versus levels of 5-HT, 5-HIAA and 5-HIAA/5-HT measured in tissue microdissected from the preoptic area (POA), ventral tuberal nucleus (VTn) and raphe. *R* represents the correlation coefficient with corresponding *P*-values. Numbers in bold were statistically significant at \**P*<0.05.

| Brain region |       | 5-HT     |                | 5-HIAA   |                | 5-HIAA/5-HT  |                |
|--------------|-------|----------|----------------|----------|----------------|--------------|----------------|
|              |       | <i>R</i> | <i>P-value</i> | <i>R</i> | <i>P-value</i> | <i>R</i>     | <i>P-value</i> |
| POA          | 11-KT | 0.27     | 0.33           | 0.26     | 0.35           | -0.23        | 0.40           |
|              | GSI   | 0.15     | 0.60           | -0.37    | 0.17           | <b>-0.52</b> | <b>0.048*</b>  |
| VTn          | 11-KT | 0.12     | 0.62           | 0.02     | 0.94           | 0.28         | 0.26           |
|              | GSI   | 0.34     | 0.16           | 0.27     | 0.27           | 0.07         | 0.80           |
| Raphe        | 11-KT | -0.38    | 0.10           | -0.36    | 0.14           | -0.24        | 0.34           |
|              | GSI   | -0.05    | 0.84           | -0.19    | 0.46           | <b>-0.48</b> | <b>0.04*</b>   |

**Table S3****Correlations by social group between gonadosomatic index (GSI) and 5-HIAA/5-HT measured in discrete brain nuclei**

Correlations of GSI versus 5-HIAA/5-HT measured in tissue microdissected from the preoptic area (POA), ventral tuberal nucleus (VTn) and raphe are shown separately for each social group. *R* represents the correlation coefficient with corresponding *P*-values. Numbers in bold were statistically significant at **\*\**P*<0.01**.

| Brain region | Subordinate  |                 | Dominant |                 |
|--------------|--------------|-----------------|----------|-----------------|
|              | <i>R</i>     | <i>P</i> -value | <i>R</i> | <i>P</i> -value |
| POA          | -0.41        | 0.33            | -0.14    | 0.78            |
| VTn          | -0.38        | 0.36            | -0.28    | 0.43            |
| Raphe        | <b>-0.83</b> | <b>0.005**</b>  | 0.25     | 0.52            |

**Table S4****Correlations of behaviors associated with dominant status and 5-HIAA/5-HT levels in discrete brain nuclei**

Correlations between specific dominance behaviors and 5-HIAA/5-HT measured in preoptic area (POA), ventral tuberal nucleus (VTn) and raphe. For each animal, the total number of times a given behavior was displayed over the 30 min period immediately before time of sacrifice, was used as a single data point in the behavior data set. *R* represents the correlation coefficient with corresponding *P*-values. Numbers in bold were statistically significant at \**P*<0.05, \*\**P*<0.01.

|                 | Quiver         | Lateral display | Lead         | Border fight |
|-----------------|----------------|-----------------|--------------|--------------|
| <b>POA</b>      |                |                 |              |              |
| <i>R</i>        | 0.61           | <b>-0.86</b>    | <b>0.85</b>  | 0.00         |
| <i>P</i> -value | 0.15           | <b>0.02*</b>    | <b>0.03*</b> | > 0.99       |
| <i>N</i>        | 7              | 7               | 7            | 7            |
| <b>VTn</b>      |                |                 |              |              |
| <i>R</i>        | <b>-0.85</b>   | 0.35            | -0.62        | -0.02        |
| <i>P</i> -value | <b>0.003**</b> | 0.24            | 0.10         | 0.96         |
| <i>N</i>        | 9              | 13              | 8            | 11           |
| <b>Raphe</b>    |                |                 |              |              |
| <i>R</i>        | -0.13          | -0.25           | 0.60         | 0.18         |
| <i>P</i> -value | 0.73           | 0.48            | 0.09         | 0.64         |
| <i>N</i>        | 9              | 9               | 9            | 9            |



**Table S5****Amplicon melting temperatures for genes used in qPCR assays**

| <b>Gene</b>  | <b>Amplicon melting temperature (°C)</b> |
|--------------|------------------------------------------|
| <i>gapdh</i> | 77.5                                     |
| <i>rpl32</i> | 82                                       |
| <i>htr1a</i> | 82.5                                     |
| <i>htr1d</i> | 83                                       |
| <i>htr2a</i> | 79                                       |
| <i>htr3b</i> | 79.5                                     |
| <i>htr6</i>  | 85                                       |

**Table S6****Primer sequences and accession numbers for genes used in qPCR assays**

| <b>Gene</b>  | <b>Forward primer 5'-3'</b>     | <b>Reverse primer 5'-3'</b>     | <b>Accession number</b> |
|--------------|---------------------------------|---------------------------------|-------------------------|
| <i>gapdh</i> | CAC ACA AGC CCA ACC CAT AGT CAT | AAC CAC ACT GCT GCT GCC TAC ATA | AF123727                |
| <i>rpl32</i> | TGC TGA TGC CCA ACA TCG GTT     | TCT TGG AGG AGA CAT TGT GGG     | XM005931788.1           |
| <i>htr1a</i> | ATG TAG CAC GAC TCC TGG CAG AAA | TCA TCA TGG GCA CCT TCA TCC TCT | GQ221844.2              |
| <i>htr1d</i> | TCC ACA CAC CTG CCA ACT TCC TAA | GCG CAA TTA CAC ACA GGT GCA AGA | GQ227406                |
| <i>htr2a</i> | CAT CCA TCA TGC ACC TTT GTG CCA | GAA TTG AAG CGG CTG TGG TGG ATT | GQ227409                |
| <i>htr3b</i> | ACT GCT GTC CAT TCC TTC ACG CTA | GCC GGC GAA TCA ACA CGT TAA ACT | GQ227408                |
| <i>htr6</i>  | TCG ATC TAT GGT GGC ATT GGT GGT | GCT GCA GCA CAT CAC ATC AAA GCA | GQ227403                |
